# Supplementary material for: Unusual enhancement in the electroreduction of oxygen by NiCoPt by surface tunability through potential cycling
Source: Royal Society of Chemistry journal article supplement (doi:10.1039/c6ra27611c), 2017-01-01
Supplement: c6ra27611c1.pdf [file c6ra27611c1.pdf]

## **Supporting Information**

### **Unusual Enhancement in the Electroreduction of Oxygen by NiCoPt by Surface Tunability through Potential Cycling**

Moorthi Lokanathan,<sup>ab</sup> Indrajit M. Patil,<sup>ac</sup> Alhasan Kabiru Usman,<sup>c</sup> Anita Swami,<sup>c</sup> Pravin  
Walke,<sup>d</sup> M. Navaneethan<sup>e</sup> and Bhalchandra Kakade<sup>ac\*</sup>

SRM Research Institute,<sup>a</sup> SRM University, Kattankulathur - 603 203, Chennai (India)

Department of Physics and Nanotechnology,<sup>b</sup> SRM University, Kattankulathur - 603 203,  
Chennai (India)

Department of Chemistry,<sup>c</sup> SRM University, Kattankulathur - 603 203, Chennai (India)

National Centre for Nanosciences and Nanotechnology,<sup>d</sup> University of Mumbai,  
Mumbai - 400098 (India)

Research Institute of Electronics,<sup>e</sup> Shizuoka University, 3-5-1 Johoku, Naka-Ku,  
Hamamatsu, Shizuoka 432-8011, Japan.

Fax: (+91) 44-2745 6702; Tel: (+91) 44-2741 7920.

\*Corresponding author E-mail: [bhalchandrakakade.a@res.srmuniv.ac.in](mailto:bhalchandrakakade.a@res.srmuniv.ac.in)

**Table S1.** The activity comparison of various NCP catalysts

| <b>Catalyst</b> | <b>ECSA (m<sup>2</sup>/g<sub>Pt</sub>)</b> | <b>Im (mA/mg<sub>Pt</sub>)</b> | <b>Is (mA/cm<sup>2</sup><sub>Pt</sub>)</b> |
|-----------------|--------------------------------------------|--------------------------------|--------------------------------------------|
| NCP6/C          | 26.48                                      | 141.46                         | 534.07                                     |
| NCP8/C          | 13.169                                     | 96.24                          | 729.97                                     |
| <b>NCP10/C</b>  | <b>68.18</b>                               | <b>505.24</b>                  | <b>741.31</b>                              |
| NCP16/C         | 21.7                                       | 271.36                         | 651.709                                    |

**Table S2.** Comparison of electrochemical activity of Pt-based ternary alloy catalysts

| S. No. | Catalyst                | ECSA (m <sup>2</sup> /g <sub>Pt</sub> ) |                 | MA (A/mg <sub>Pt</sub> ) |                 | Normalized MA loss or gain @ 0.9 V (%) /cycles (1k=1000) |          |            | Ref. |
|--------|-------------------------|-----------------------------------------|-----------------|--------------------------|-----------------|----------------------------------------------------------|----------|------------|------|
|        |                         | Before stability                        | After stability | Before stability         | After stability | Loss (%)                                                 | Gain (%) | Cycles (k) |      |
|        |                         |                                         |                 |                          |                 |                                                          |          |            |      |
| 2      | Pt-Rh-Ni/C              | N/A                                     | N/A             | 0.82                     | 1.14            |                                                          | 39       | 4k         | 2    |
| 3      | Pt-Rh-Ni/C              | N/A                                     | N/A             | 0.82                     | 0.72            | 12.2                                                     |          | 8k         | 2    |
| 4      | Pt-Rh-Ni/C              | N/A                                     | N/A             | 0.82                     | 0.32            | 61                                                       |          | 30k        | 2    |
| 5      | Pt3Ni-Fe/C (13 nm)      | 28.9                                    | 27.46           | 0.37                     | N/A             | 25                                                       |          | 16k        | 3    |
| 6      | Mo-Pt3Ni/C              | 67.7                                    | N/A             | 6.98                     | 6.6             | 5.5                                                      |          | 8k         | 4    |
| 7      | Pt2CuNi/C               | 35.3                                    | 36.85           | 2.35                     | 1.91            | 18.7                                                     |          | 4k         | 5    |
| 8      | Pt2CuNi/C               | 35.3                                    | N/A             | 2.35                     | 1.60            | 31.9                                                     |          | 10k        | 5    |
| 9      | PtCu3Co                 | 112                                     | N/A             | 0.37                     | N/A             | N/A                                                      | N/A      | N/A        | 6    |
| 10     | PtCuCo3                 | 111                                     | N/A             | 0.49                     | N/A             | N/A                                                      | N/A      | N/A        | 6    |
| 11     | Pt30Ni51Co19 – 1 step   | 8.6                                     | N/A             | N/A                      | N/A             | 47                                                       |          | 4k         | 7    |
| 12     | Pt48Ni27Co25 – 2 step   | 3                                       | N/A             | N/A                      | N/A             | 51                                                       |          | 4k         | 7    |
| 13     | Pt36Ni15Co49/C – 400 °C | 56.6                                    | N/A             | 0.56                     | 0.11            | 80.4                                                     |          | 10k        | 8    |
| 14     | Pt36Ni15Co49/C – 700 °C | 48.0                                    | N/A             | 0.73                     | 0.15            | 79.5                                                     |          | 10k        | 8    |
| 15     | Pt36Ni15Co49/C – 926 °C | 47.7                                    | N/A             | 0.88                     | 0.21            | 76.1                                                     |          | 10k        | 8    |
| 16     | Ni@Au@PtNi/C            | 51                                      | 50              | 0.38                     | 0.35            | <10                                                      |          | 10k        | 9    |
| 17     | PtCoMn                  | N/A                                     | N/A             | 2.1                      | 1.0             | 52.4                                                     |          | 1.08k      | 10   |
| 18     | PtCoMn                  | N/A                                     | N/A             | N/A                      | 0.216           | 71.4                                                     |          | 2.16k      | 10   |
| 19     | Pt2FeCo/C –L10          | 2.6                                     | 3.2             | 0.51                     | 0.4             | 21.6                                                     |          | 2.16k      | 11   |

|           |                    |             |             |               |               |      |             |            |                  |
|-----------|--------------------|-------------|-------------|---------------|---------------|------|-------------|------------|------------------|
| 20        | Pt6FeCo/C –L12     | 3.45        | 2           | 0.27          | 0.17          | 37.0 |             | 5k         | 11               |
| 21        | Pt2FeCo/C – 800 °C | 60          | 52          | 0.505         | 0.38          | 24.8 |             | 5k         | 12               |
| 22        | Pt2FeCo/C          | 4.51        | 3.87        | 0.0665        | 0.0286        | 57   |             | 5k         | 13               |
| 23        | Pt2FeNi/C          | 4.25        | 5.12        | 0.0684        | 0.0286        | 58.2 |             | 2k         | 13               |
| 24        | Pt2CoNi/C          | 3.97        | 3.10        | 0.0634        | 0.0298        | 53   |             | 2k         | 13               |
| 25        | PtNiFe nanocubes   | 70.4        | N/A         | 0.00534       | 0.00498       | 6.7  |             | 1k         | 14               |
| 26        | PtNiFe octahedran  | 73.3        | N/A         | 0.0042        | N/A           | N/A  |             | N/A        | 14               |
| 27        | PtNiFe polyhedran  | 68.5        | N/A         | 0.00467       | N/A           | N/A  |             | N/A        | 14               |
| 28        | PtNiFe nanowire    | 69.3        | N/A         | 0.00399       | N/A           | N/A  |             | N/A        | 14               |
| 29        | Pt-Ni-Ir/C         | 49.45       | 44.51       | 0.511         | 0.337         | 34   |             | 10k        | 15               |
| 30        | Fct-PtFeCu         | 43          | 36          | 0.5           | 0.38          | 24   |             | 10k        | 16               |
| 31        | Fct-PtFeCo         | 52          | 37          | 0.48          | 0.32          | 33.3 |             | 10k        | 16               |
| <b>30</b> | <b>PtNiCo/C</b>    | <b>68.1</b> | <b>54.7</b> | <b>0.5052</b> | <b>0.5811</b> |      | <b>15</b>   | <b>10k</b> | <b>This work</b> |
| <b>31</b> | <b>PtNiCo/C</b>    | <b>68.1</b> | <b>52.3</b> | <b>0.505</b>  | <b>0.6557</b> |      | <b>29.8</b> | <b>20k</b> | <b>This work</b> |
| <b>32</b> | <b>PtNiCo/C</b>    | <b>68.1</b> | <b>51.5</b> | <b>0.505</b>  | <b>0.6957</b> |      | <b>37.7</b> | <b>30k</b> | <b>This work</b> |

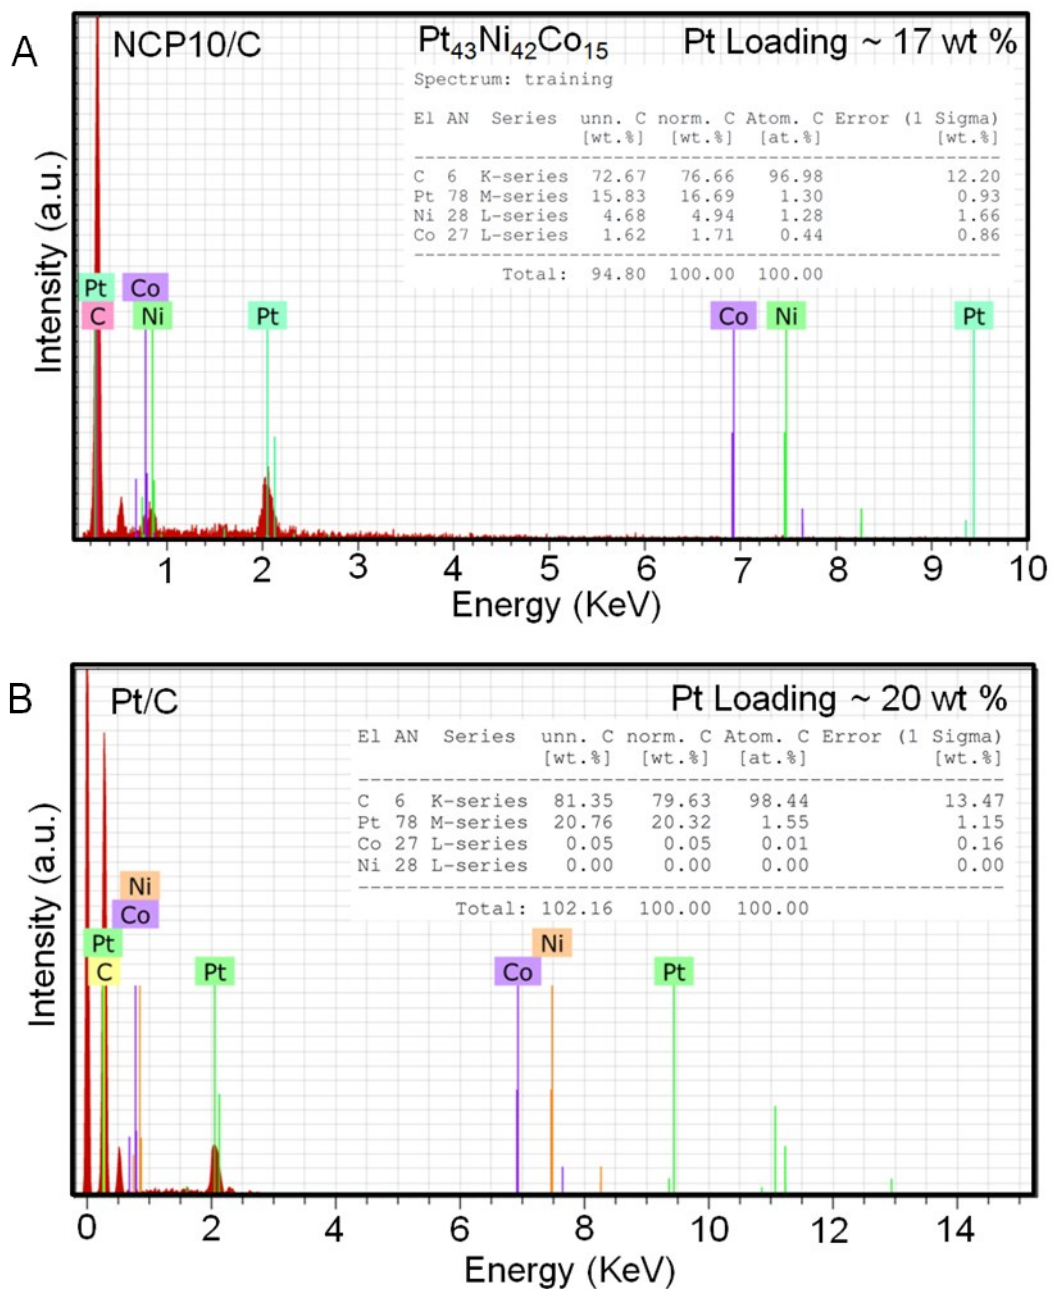

**Figure S1.** EDX patterns of (A) The NCP10/C catalyst and (B) commercial Pt/C.

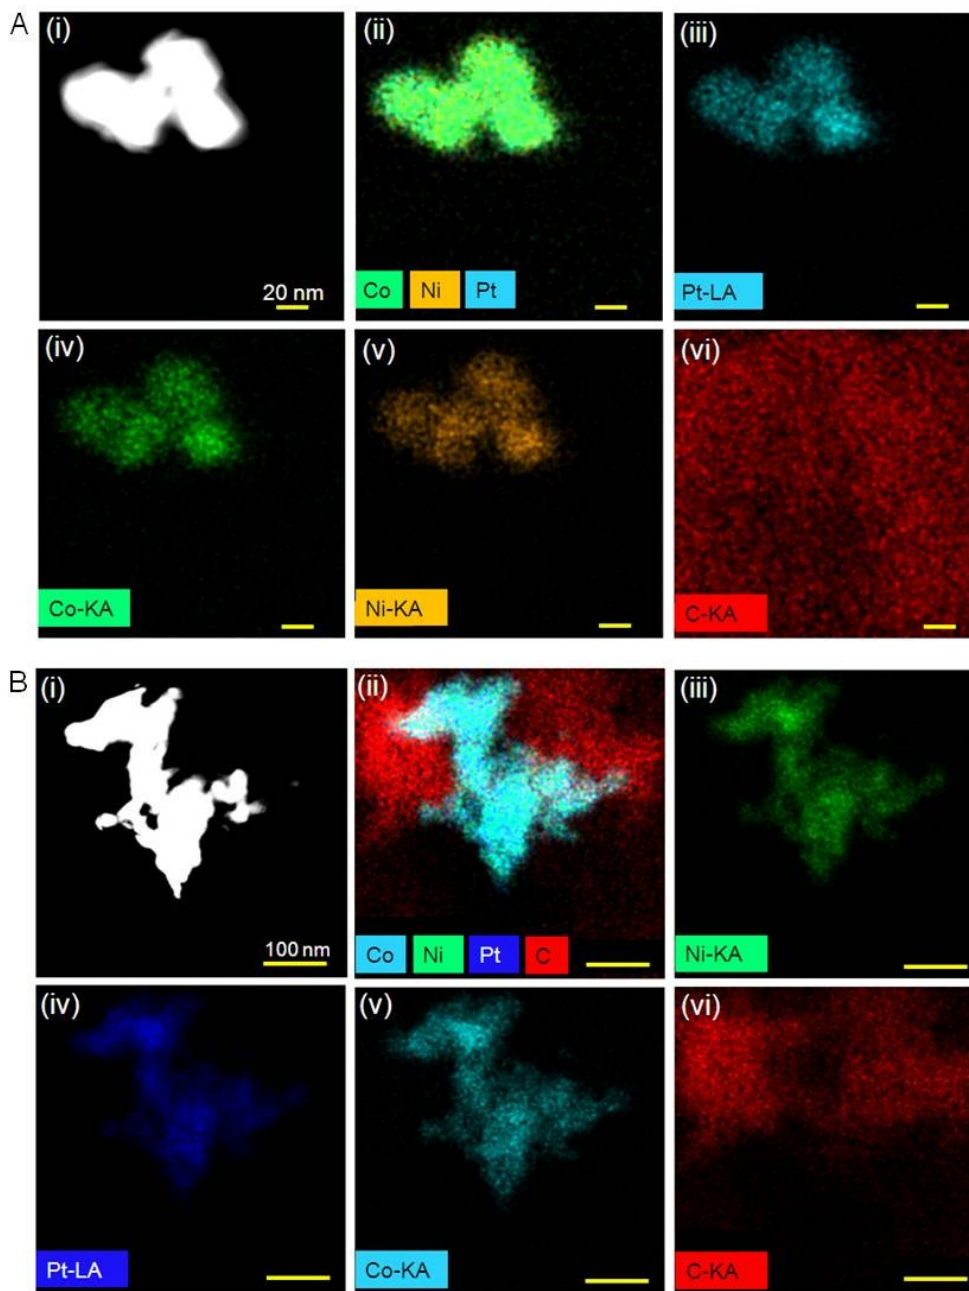

**Figure S2.** A (i) HAADF-STEM image of a NCP10/C before stability test. (ii-vi) EDS elemental mapping distributions for (ii) Co, Ni and Pt;(iii) Pt;(iv) Co; (v) Ni and (vi) C. B (i) HAADF-STEM image of a NCP10/C after stability test. (ii-vi) EDS elemental mapping distributions for (ii) Co, Ni, Pt and C;(iii) Ni;(iv) Pt;(v) Co and (vi) C.

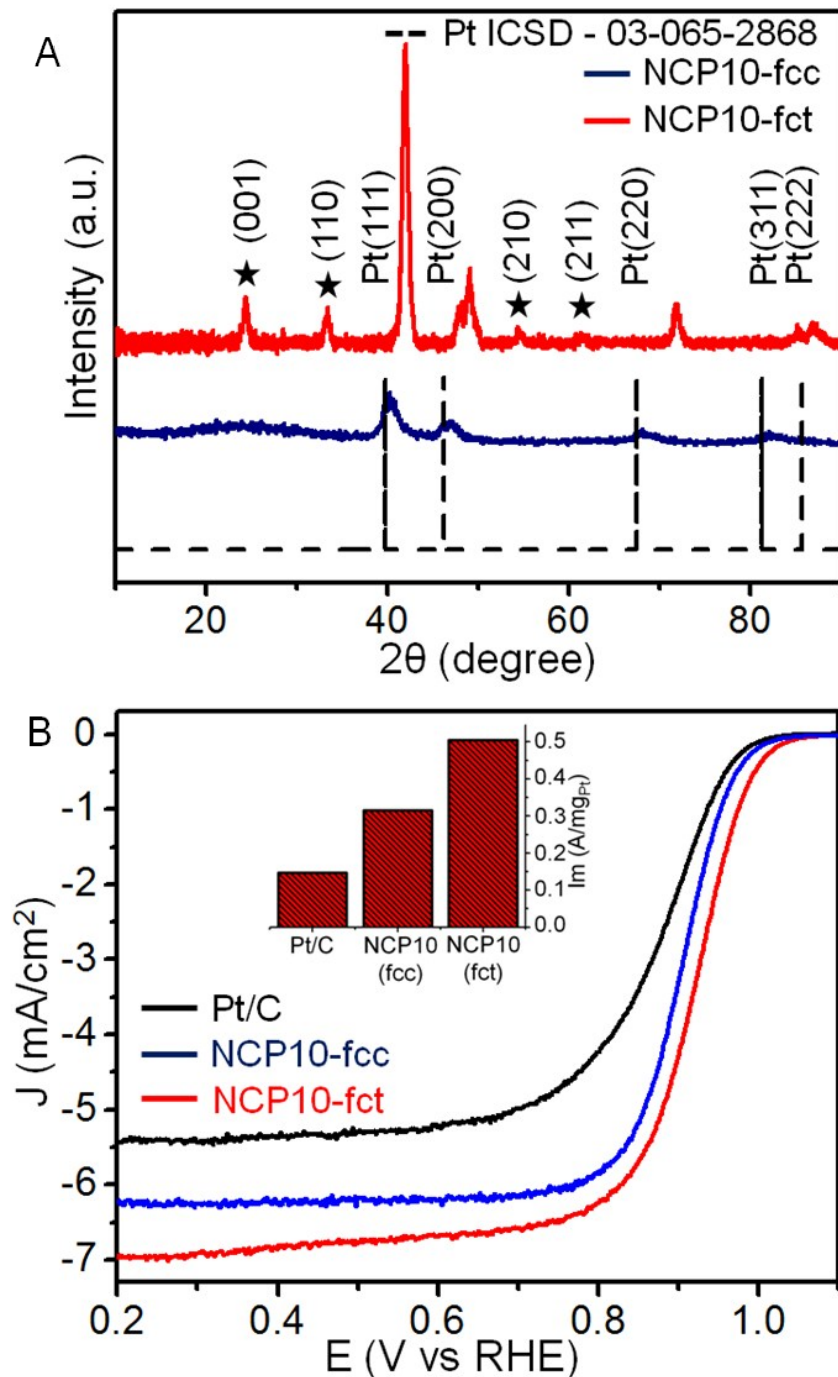

**Figure S3.** (A) Comparative XRD pattern of fcc and fct structure of NCP10/C catalyst with Pt ICSD-03-065-2868. (B) Linear sweep voltammograms of NCP10(fcc), NCP10(fct) and Commercial Pt/C catalyst, recorded in the presence of O<sub>2</sub>-saturated 0.1 M HClO<sub>4</sub> at 25°C at a sweep rate of 10 mVs<sup>-1</sup> and rotation rate of 1600 rpm and inset shows the their comparative mass activity ( $I_m$ ).

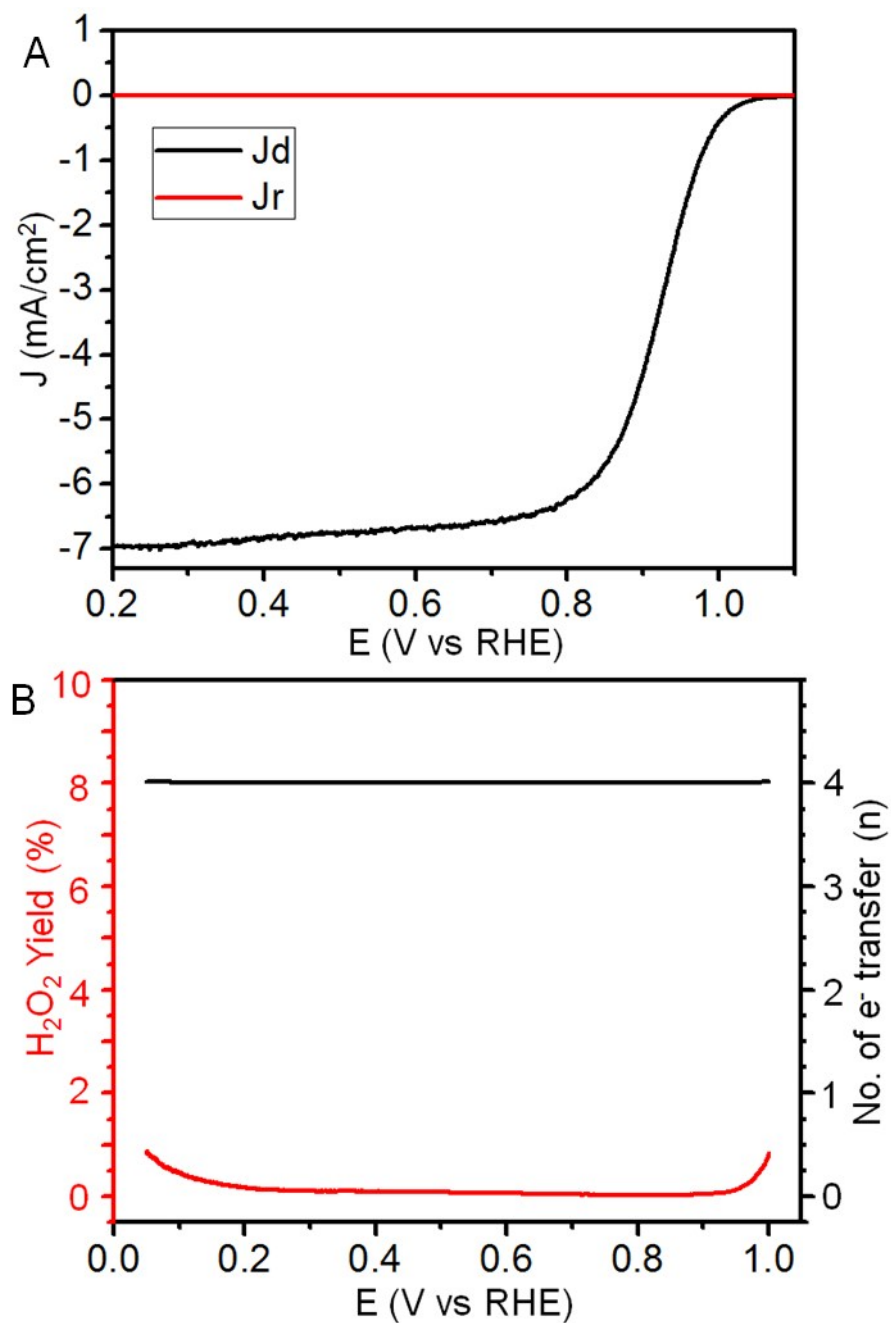

**Figure S4.** (A) Rotating ring-disk electrode (RRDE) voltammograms of NCP10/C catalyst. The disk electrode was scanned at a rate of  $10 \text{ mV s}^{-1}$  with 1600 rpm and the ring potential was kept constant at 1.3 V vs. RHE. (B)  $H_2O_2$  percentage yield and no. of electron transfer during the reaction.



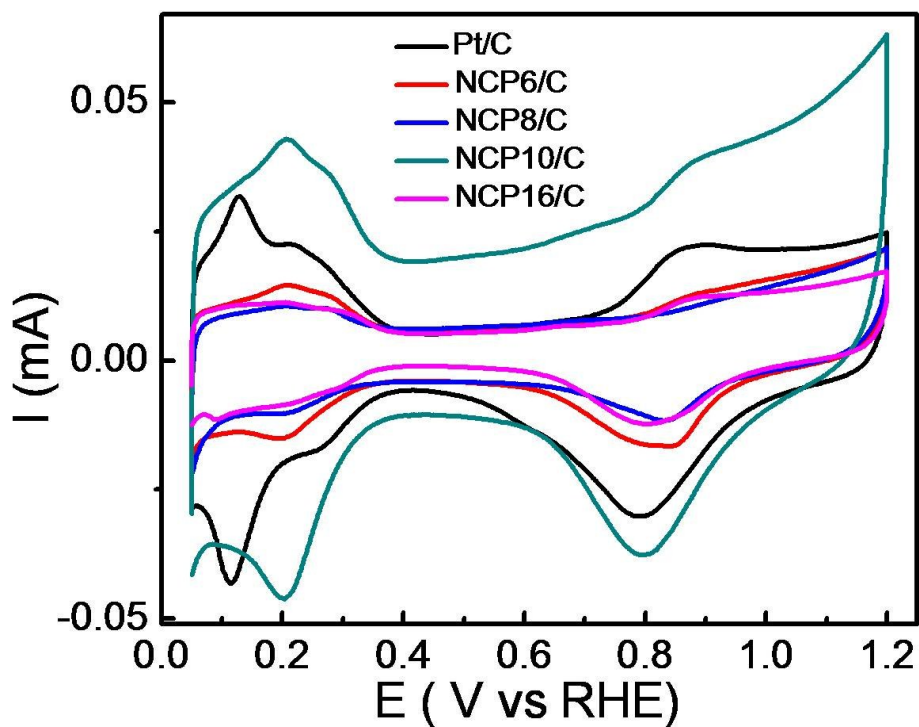

**Figure S5.** The Cyclic voltammograms comparison of NCP6/C, NCP8/C, NCP10/C, NCP16/C electrocatalyst with Commercial Pt/C catalyst, recorded in the presence of  $N_2$ -saturated 0.1 M  $HClO_4$  at a sweep rate of  $20 \text{ mVs}^{-1}$ .

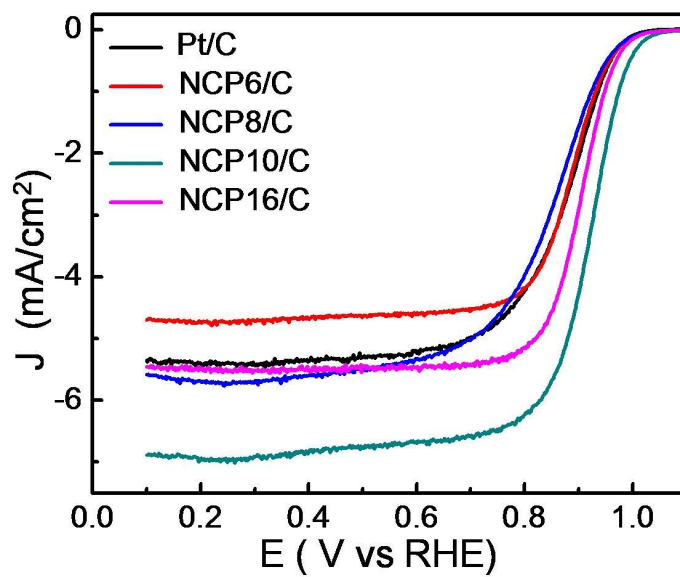

**Figure S6.** Linear sweep voltammograms of NCP6/C, NCP8/C, NCP10/C, NCP16/C and Commercial Pt/C catalyst, recorded in the presence of O<sub>2</sub>-saturated 0.1 M HClO<sub>4</sub> at 25°C at a sweep rate of 10 mVs<sup>-1</sup> and rotation rate of 1600 rpm

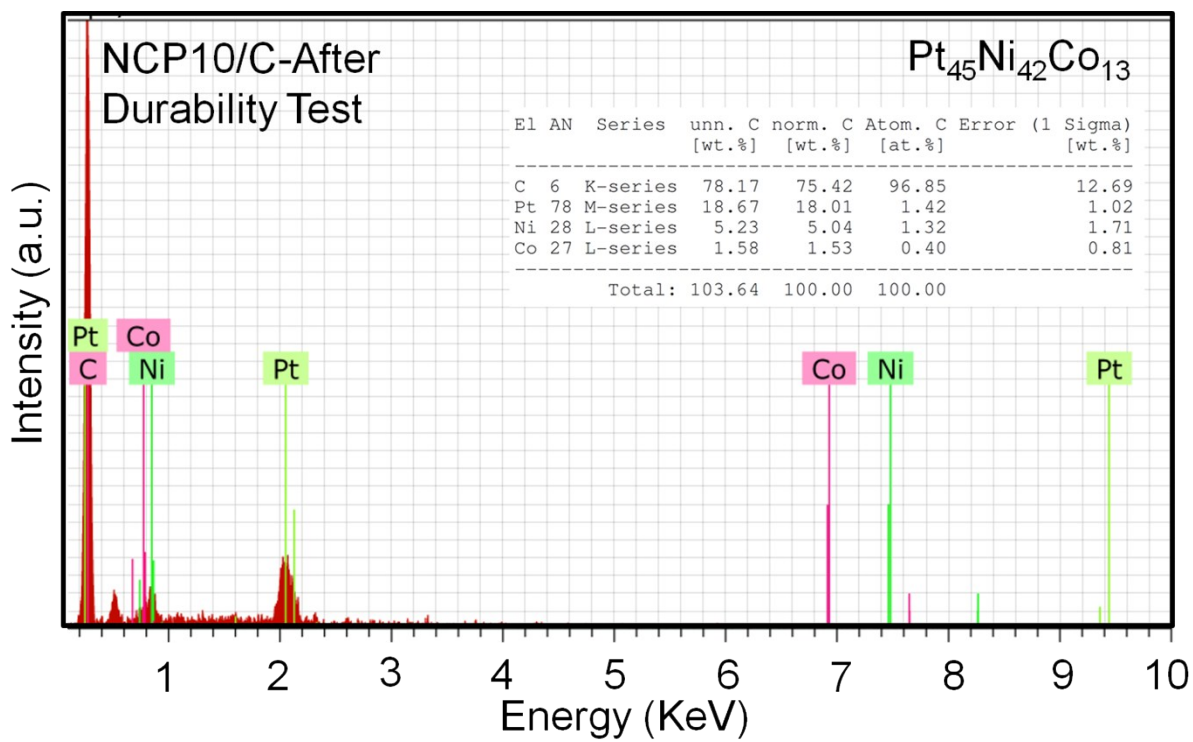

**Figure S7.** EDX patterns of the NCP10/C catalyst after 30 k durability cycles.

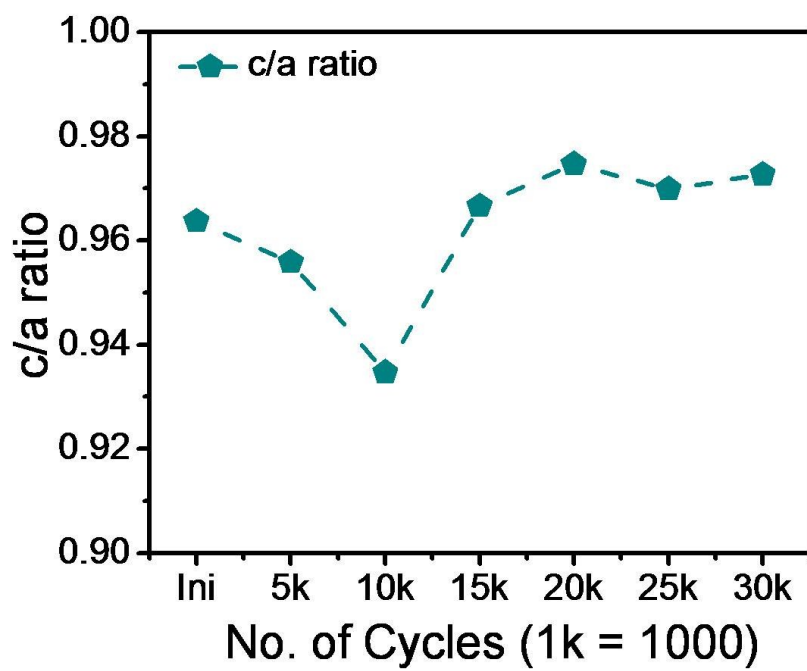

**Figure S8.** The c/a ratio of the NCP10/C catalyst calculated from the XRD pattern after different stability cycles.

## REFERENCES:

1. R. Loukrakpam, B. N. Wanjala, J. Yin, B. Fang, J. Luo, M. Shao, L. Protsailo, T. Kawamura, Y. Chen and V. Petkov, *ACS Catalysis*, 2011, **1**, 562-572.
2. V. Beermann, M. Gocyla, E. Willinger, S. Rudi, M. Heggen, R. E. Dunin-Borkowski, M.-G. Willinger and P. Strasser, *Nano letters*, 2016, **16**, 1719-1725.
3. Y. Li, F. Quan, L. Chen, W. Zhang, H. Yu and C. Chen, *RSC Advances*, 2014, **4**, 1895-1899.
4. X. Huang, Z. Zhao, L. Cao, Y. Chen, E. Zhu, Z. Lin, M. Li, A. Yan, A. Zettl and Y. M. Wang, *Science*, 2015, **348**, 1230-1234.
5. C. Zhang, W. Sandorf and Z. Peng, *ACS Catalysis*, 2015, **5**, 2296-2300.
6. R. Srivastava, P. Mani, N. Hahn and P. Strasser, *Angewandte Chemie International Edition*, 2007, **46**, 8988-8991.
7. R. M. Arán-Ais, F. Dionigi, T. Merzdorf, M. Gocyla, M. Heggen, R. E. Dunin-Borkowski, M. Gliech, J. Solla-Gullón, E. Herrero and J. M. Feliu, *Nano letters*, 2015, **15**, 7473-7480.
8. B. N. Wanjala, R. Loukrakpam, J. Luo, P. N. Njoki, D. Mott, C.-J. Zhong, M. Shao, L. Protsailo and T. Kawamura, *The Journal of Physical Chemistry C*, 2010, **114**, 17580-17590.
9. Y. Kang, J. Snyder, M. Chi, D. Li, K. L. More, N. M. Markovic and V. R. Stamenkovic, *Nano letters*, 2014, **14**, 6361-6367.
10. M. Ishida and K. Matsutani, *ECS Transactions*, 2014, **64**, 107-112.
11. T. Tamaki, A. Minagawa, B. Arumugam, B. A. Kakade and T. Yamaguchi, *Journal of Power Sources*, 2014, **271**, 346-353.
12. B. Arumugam, B. A. Kakade, T. Tamaki, M. Arao, H. Imai and T. Yamaguchi, *RSC Advances*, 2014, **4**, 27510-27517.
13. M. T. Nguyen, R. H. Wakabayashi, M. Yang, H. D. Abruña and F. J. DiSalvo, *Journal of Power Sources*, 2015, **280**, 459-466.
14. S.-W. Chou, J.-J. Shyue, C.-H. Chien, C.-C. Chen, Y.-Y. Chen and P.-T. Chou, *Chemistry of Materials*, 2012, **24**, 2527-2533.

15. T. Yang, G. Cao, Q. Huang, Y. Ma, S. Wan, H. Zhao, N. Li, F. Yin, X. Sun and D. Zhang, *Journal of Power Sources*, 2015, **291**, 201-208.
16. B. Arumugam, T. Tamaki and T. Yamaguchi, *ACS applied materials & interfaces*, 2015, **7**, 16311-16321.
